# Supplementary material for: Getting more than “claps”: incentive preferences of voluntary community-based mobilizers in Tanzania
Source: PubMed Central journal article supplement (PMC6918602; doi:10.1186/s12960-019-0438-5), 2019-12-17
Supplement: 12960_2019_438_MOESM1_ESM.pdf [file 12960_2019_438_MOESM1_ESM.pdf]

## Respondent details

|          |                                                                                             |
|----------|---------------------------------------------------------------------------------------------|
| Age      |                                                                                             |
| Sex      |                                                                                             |
| Facility |                                                                                             |
| Job      | <input type="checkbox"/> CBM<br><input type="checkbox"/> CM<br><input type="checkbox"/> CAA |

- You are asked 8 questions.
- For each question, choose option A or B.
- Each option contains possible conditions to support your work as a CBM.
- You always have to choose **one** of the two options. Even if you are not sure, select the option that is best according to your opinion.
- Do not select both options or leave both options blank.

### Question 1

|                       |                                                                                                                                                                                                   |
|-----------------------|---------------------------------------------------------------------------------------------------------------------------------------------------------------------------------------------------|
| <b>Option 1.A</b>     | <input type="checkbox"/>                                                                                                                                                                          |
| <b>Remuneration</b>   | 60.000 TSH/month                                                                                                                                                                                  |
| <b>Training</b>       | CBMs to attend a seminar at the centre on a specific health topic every 6 months                                                                                                                  |
| <b>Supervision</b>    | Monthly progress review meetings including receiving monthly progress report + centre manager or centre administrative assistant accompany all vikundi visits and give immediate feedback to CBMs |
| <b>Benefits</b>       | Once every 6 months, the best performing group of CBMs in Tanzania gets a health insurance covering Marie Stopes services of 50,000 TSH for each person                                           |
| <b>Identification</b> | CBMs will receive two blue Marie Stopes T-shirts + Marie Stopes bag once                                                                                                                          |

|                       |                                                                                                                                                         |
|-----------------------|---------------------------------------------------------------------------------------------------------------------------------------------------------|
| <b>Option 1.B</b>     | <input type="checkbox"/>                                                                                                                                |
| <b>Remuneration</b>   | 60.000 TSH/month                                                                                                                                        |
| <b>Training</b>       | CBMs to attend a seminar at the centre on a specific health topic every 2 months                                                                        |
| <b>Supervision</b>    | Monthly progress review meetings + MST Dar Office visits CBMs in the field every 6 months and a group picture is taken                                  |
| <b>Benefits</b>       | Once every 6 months, the best performing group of CBMs in Tanzania gets a health insurance covering Marie Stopes services of 50,000 TSH for each person |
| <b>Identification</b> | CBMs will receive two blue Marie Stopes T-shirts + Marie Stopes bag once                                                                                |

### Question 2

|                       |                                                                                                                                                         |
|-----------------------|---------------------------------------------------------------------------------------------------------------------------------------------------------|
| <b>Option 2.A</b>     | <input type="checkbox"/>                                                                                                                                |
| <b>Remuneration</b>   | 50.000 TSH/month + 10.000 TSH extra for every 5 CPAC clients referred by the CBM group                                                                  |
| <b>Training</b>       | CBMs to attend a seminar at the centre on a specific health topic every 6 months                                                                        |
| <b>Supervision</b>    | Monthly progress review meetings + MST Dar Office visits CBMs in the field every 6 months and a group picture is taken                                  |
| <b>Benefits</b>       | Once every 6 months, the best performing group of CBMs in Tanzania gets a health insurance covering Marie Stopes services of 50,000 TSH for each person |
| <b>Identification</b> | CBMs will receive two blue Marie Stopes T-shirts + Marie Stopes bag once                                                                                |

|                       |                                                                                                                        |
|-----------------------|------------------------------------------------------------------------------------------------------------------------|
| <b>Option 2.B</b>     | <input type="checkbox"/>                                                                                               |
| <b>Remuneration</b>   | 50.000 TSH/month + 10.000 TSH extra for every 5 CPAC clients referred by the CBM group                                 |
| <b>Training</b>       | CBMs to attend a seminar at the centre on a specific health topic every 2 months                                       |
| <b>Supervision</b>    | Monthly progress review meetings + MST Dar Office visits CBMs in the field every 6 months and a group picture is taken |
| <b>Benefits</b>       | Once every 6 months, the best performing CBM at your centre gets the opportunity to visit another centre               |
| <b>Identification</b> | CBMs will receive two blue Marie Stopes T-shirts + Marie Stopes bag + ID card once                                     |

### Question 3

|                       |                                                                                                                        |
|-----------------------|------------------------------------------------------------------------------------------------------------------------|
| <b>Option 3.A</b>     | <input type="checkbox"/>                                                                                               |
| <b>Remuneration</b>   | 50.000 TSH/month + 10.000 TSH extra for every 5 CPAC clients referred by the CBM group                                 |
| <b>Training</b>       | CBMs to attend a seminar at the centre on a specific health topic every 2 months                                       |
| <b>Supervision</b>    | Monthly progress review meetings + MST Dar Office visits CBMs in the field every 6 months and a group picture is taken |
| <b>Benefits</b>       | Once every 6 months, the best performing CBM at your centre gets the opportunity to visit another centre               |
| <b>Identification</b> | CBMs will receive two blue Marie Stopes T-shirts + Marie Stopes bag once                                               |

|                       |                                                                                                                                                         |
|-----------------------|---------------------------------------------------------------------------------------------------------------------------------------------------------|
| <b>Option 3.B</b>     | <input type="checkbox"/>                                                                                                                                |
| <b>Remuneration</b>   | 50.000 TSH/month + 10.000 TSH extra for every 5 CPAC clients referred by the CBM group                                                                  |
| <b>Training</b>       | CBMs to attend a seminar at the centre on a specific health topic every 6 months                                                                        |
| <b>Supervision</b>    | Monthly progress review meetings + MST Dar Office visits CBMs in the field every 6 months and a group picture is taken                                  |
| <b>Benefits</b>       | Once every 6 months, the best performing group of CBMs in Tanzania gets a health insurance covering Marie Stopes services of 50,000 TSH for each person |
| <b>Identification</b> | CBMs will receive two blue Marie Stopes T-shirts + Marie Stopes bag + ID card once                                                                      |

### Question 4

|                       |                                                                                                                                                                                                   |
|-----------------------|---------------------------------------------------------------------------------------------------------------------------------------------------------------------------------------------------|
| <b>Option 4.A</b>     | <input type="checkbox"/>                                                                                                                                                                          |
| <b>Remuneration</b>   | 50.000 TSH/month + 10.000 TSH extra for every 5 CPAC clients referred by the CBM group                                                                                                            |
| <b>Training</b>       | CBMs to attend a seminar at the centre on a specific health topic every 2 months                                                                                                                  |
| <b>Supervision</b>    | Monthly progress review meetings including receiving monthly progress report + centre manager or centre administrative assistant accompany all vikundi visits and give immediate feedback to CBMs |
| <b>Benefits</b>       | Once every 6 months, the best performing group of CBMs in Tanzania gets a health insurance covering Marie Stopes services of 50,000 TSH for each person                                           |
| <b>Identification</b> | CBMs will receive two blue Marie Stopes T-shirts + Marie Stopes bag + ID card once                                                                                                                |

|                       |                                                                                                                                                                                                   |
|-----------------------|---------------------------------------------------------------------------------------------------------------------------------------------------------------------------------------------------|
| <b>Option 4.B</b>     | <input type="checkbox"/>                                                                                                                                                                          |
| <b>Remuneration</b>   | 50.000 TSH/month + 10.000 TSH extra for every 5 CPAC clients referred by the CBM group                                                                                                            |
| <b>Training</b>       | CBMs to attend a seminar at the centre on a specific health topic every 2 months                                                                                                                  |
| <b>Supervision</b>    | Monthly progress review meetings including receiving monthly progress report + centre manager or centre administrative assistant accompany all vikundi visits and give immediate feedback to CBMs |
| <b>Benefits</b>       | Once every 6 months, the best performing group of CBMs in Tanzania gets a health insurance covering Marie Stopes services of 50,000 TSH for each person                                           |
| <b>Identification</b> | CBMs will receive two blue Marie Stopes T-shirts + Marie Stopes bag once                                                                                                                          |

Question 5

|                       |                                                                                                                                                         |
|-----------------------|---------------------------------------------------------------------------------------------------------------------------------------------------------|
| <b>Option 5.A</b>     | <input type="checkbox"/>                                                                                                                                |
| <b>Remuneration</b>   | 60.000 TSH/month                                                                                                                                        |
| <b>Training</b>       | CBMs to attend a seminar at the centre on a specific health topic every 2 months                                                                        |
| <b>Supervision</b>    | Monthly progress review meetings + MST Dar Office visits CBMs in the field every 6 months and a group picture is taken                                  |
| <b>Benefits</b>       | Once every 6 months, the best performing group of CBMs in Tanzania gets a health insurance covering Marie Stopes services of 50,000 TSH for each person |
| <b>Identification</b> | CBMs will receive two blue Marie Stopes T-shirts + Marie Stopes bag + ID card once                                                                      |

|                       |                                                                                                                                                                                                   |
|-----------------------|---------------------------------------------------------------------------------------------------------------------------------------------------------------------------------------------------|
| <b>Option 5.B</b>     | <input type="checkbox"/>                                                                                                                                                                          |
| <b>Remuneration</b>   | 60.000 TSH/month                                                                                                                                                                                  |
| <b>Training</b>       | CBMs to attend a seminar at the centre on a specific health topic every 6 months                                                                                                                  |
| <b>Supervision</b>    | Monthly progress review meetings including receiving monthly progress report + centre manager or centre administrative assistant accompany all vikundi visits and give immediate feedback to CBMs |
| <b>Benefits</b>       | Once every 6 months, the best performing group of CBMs in Tanzania gets a health insurance covering Marie Stopes services of 50,000 TSH for each person                                           |
| <b>Identification</b> | CBMs will receive two blue Marie Stopes T-shirts + Marie Stopes bag + ID card once                                                                                                                |

Question 6

|                       |                                                                                                                                                                                                   |
|-----------------------|---------------------------------------------------------------------------------------------------------------------------------------------------------------------------------------------------|
| <b>Option 6.A</b>     | <input type="checkbox"/>                                                                                                                                                                          |
| <b>Remuneration</b>   | 50.000 TSH/month + 10.000 TSH extra for every 5 CPAC clients referred by the CBM group                                                                                                            |
| <b>Training</b>       | CBMs to attend a seminar at the centre on a specific health topic every 6 months                                                                                                                  |
| <b>Supervision</b>    | Monthly progress review meetings including receiving monthly progress report + centre manager or centre administrative assistant accompany all vikundi visits and give immediate feedback to CBMs |
| <b>Benefits</b>       | Once every 6 months, the best performing CBM at your centre gets the opportunity to visit another centre                                                                                          |
| <b>Identification</b> | CBMs will receive two blue Marie Stopes T-shirts + Marie Stopes bag + ID card once                                                                                                                |

|                       |                                                                                                                                                                                                   |
|-----------------------|---------------------------------------------------------------------------------------------------------------------------------------------------------------------------------------------------|
| <b>Option 6.B</b>     | <input type="checkbox"/>                                                                                                                                                                          |
| <b>Remuneration</b>   | 60.000 TSH/month                                                                                                                                                                                  |
| <b>Training</b>       | CBMs to attend a seminar at the centre on a specific health topic every 2 months                                                                                                                  |
| <b>Supervision</b>    | Monthly progress review meetings including receiving monthly progress report + centre manager or centre administrative assistant accompany all vikundi visits and give immediate feedback to CBMs |
| <b>Benefits</b>       | Once every 6 months, the best performing CBM at your centre gets the opportunity to visit another centre                                                                                          |
| <b>Identification</b> | CBMs will receive two blue Marie Stopes T-shirts + Marie Stopes bag + ID card once                                                                                                                |

Question 7

|                       |                                                                                                                        |
|-----------------------|------------------------------------------------------------------------------------------------------------------------|
| <b>Option 7.A</b>     | <input type="checkbox"/>                                                                                               |
| <b>Remuneration</b>   | 60.000 TSH/month                                                                                                       |
| <b>Training</b>       | CBMs to attend a seminar at the centre on a specific health topic every 6 months                                       |
| <b>Supervision</b>    | Monthly progress review meetings + MST Dar Office visits CBMs in the field every 6 months and a group picture is taken |
| <b>Benefits</b>       | Once every 6 months, the best performing CBM at your centre gets the opportunity to visit another centre               |
| <b>Identification</b> | CBMs will receive two blue Marie Stopes T-shirts + Marie Stopes bag + ID card once                                     |

|                       |                                                                                                                        |
|-----------------------|------------------------------------------------------------------------------------------------------------------------|
| <b>Option 7.B</b>     | <input type="checkbox"/>                                                                                               |
| <b>Remuneration</b>   | 60.000 TSH/month                                                                                                       |
| <b>Training</b>       | CBMs to attend a seminar at the centre on a specific health topic every 6 months                                       |
| <b>Supervision</b>    | Monthly progress review meetings + MST Dar Office visits CBMs in the field every 6 months and a group picture is taken |
| <b>Benefits</b>       | Once every 6 months, the best performing CBM at your centre gets the opportunity to visit another centre               |
| <b>Identification</b> | CBMs will receive two blue Marie Stopes T-shirts + Marie Stopes bag once                                               |

Question 8

|                       |                                                                                                                                                                                                   |
|-----------------------|---------------------------------------------------------------------------------------------------------------------------------------------------------------------------------------------------|
| <b>Option 8.A</b>     | <input type="checkbox"/>                                                                                                                                                                          |
| <b>Remuneration</b>   | 60.000 TSH/month                                                                                                                                                                                  |
| <b>Training</b>       | CBMs to attend a seminar at the centre on a specific health topic every 2 months                                                                                                                  |
| <b>Supervision</b>    | Monthly progress review meetings including receiving monthly progress report + centre manager or centre administrative assistant accompany all vikundi visits and give immediate feedback to CBMs |
| <b>Benefits</b>       | Once every 6 months, the best performing CBM at your centre gets the opportunity to visit another centre                                                                                          |
| <b>Identification</b> | CBMs will receive two blue Marie Stopes T-shirts + Marie Stopes bag once                                                                                                                          |

|                       |                                                                                                                                                                                                   |
|-----------------------|---------------------------------------------------------------------------------------------------------------------------------------------------------------------------------------------------|
| <b>Option 8.B</b>     | <input type="checkbox"/>                                                                                                                                                                          |
| <b>Remuneration</b>   | 50.000 TSH/month + 10.000 TSH extra for every 5 CPAC clients referred by the CBM group                                                                                                            |
| <b>Training</b>       | CBMs to attend a seminar at the centre on a specific health topic every 6 months                                                                                                                  |
| <b>Supervision</b>    | Monthly progress review meetings including receiving monthly progress report + centre manager or centre administrative assistant accompany all vikundi visits and give immediate feedback to CBMs |
| <b>Benefits</b>       | Once every 6 months, the best performing CBM at your centre gets the opportunity to visit another centre                                                                                          |
| <b>Identification</b> | CBMs will receive two blue Marie Stopes T-shirts + Marie Stopes bag once                                                                                                                          |

THANK YOU!
